# Supplementary material
Source: PubMed Central journal article supplement (PMC6537535)
Supplement: mmc1.pdf [file mmc1.pdf]

**Supplementary Table 1. Incident pulmonary diagnoses by HIV status and coding source.**

|                                             | HIV+            |                              |                                 | HIV-            |                              |                                 |
|---------------------------------------------|-----------------|------------------------------|---------------------------------|-----------------|------------------------------|---------------------------------|
|                                             | Total diagnoses | ICD code source <sup>1</sup> | Self-report source <sup>2</sup> | Total diagnoses | ICD code source <sup>1</sup> | Self-report source <sup>2</sup> |
| <b>Infectious diagnoses</b>                 |                 |                              |                                 |                 |                              |                                 |
| Influenza or viral pneumonia                | 231             | 217 (93.9)                   | 14 (6.1)                        | 189             | 184 (97.4)                   | 5 (2.6)                         |
| Bacterial pneumonia                         | 153             | 89 (58.2)                    | 64 (41.8)                       | 41              | 28 (68.3)                    | 13 (31.7)                       |
| Other pneumonia                             | 324             | 167 (51.5)                   | 157 (48.5)                      | 159             | 76 (47.8)                    | 83 (52.2)                       |
| Other opportunistic infections <sup>3</sup> | 53              | 37 (69.8)                    | 16 (30.2)                       | 7               | 5 (71.4)                     | 2 (28.6)                        |
| <b>Non-infectious diagnoses</b>             |                 |                              |                                 |                 |                              |                                 |
| Chronic bronchitis                          | 238             | 46 (19.3)                    | 192 (80.7)                      | 192             | 35 (18.2)                    | 157 (81.8)                      |
| COPD or emphysema                           | 28              | 28 (100.0)                   | 0 (0.0)                         | 35              | 35 (100.0)                   | 0 (0.0)                         |
| Lung cancer <sup>3</sup>                    | 10              | 10 (100.0)                   | 0 (0.0)                         | 7               | 7 (100.0)                    | 0 (0.0)                         |
| Other non-infectious diagnoses <sup>4</sup> | 37              | 37 (100.0)                   | 0 (0.0)                         | 29              | 29 (100.0)                   | 0 (0.0)                         |

Data are n (%) of diagnoses. See Methods – Procedures and definitions for a detailed description of diagnosis coding and sources.

1 - Diagnoses obtained from variables provided as ICD9-CM, ICD10, or ICD-O-3 codes.

2 - Diagnoses obtained from binary categorical self-report variables.

3 - *Pneumocystis* pneumonia or tuberculosis.

4 - Pulmonary hypertension, alveolar pneumonopathy, pulmonary fibrosis, bronchiectasis, other lung disease (not otherwise specified).

**Supplementary Table 2. Factors associated with risk of infectious pulmonary diagnoses among all HIV+ subjects.**

|                                                                                                  | HIV+                               |         | Model 1 – current marijuana smoking |         | Model 2 – prior two-year average marijuana smoking |         |
|--------------------------------------------------------------------------------------------------|------------------------------------|---------|-------------------------------------|---------|----------------------------------------------------|---------|
|                                                                                                  | Univariate analysis<br>HR (95% CI) | p value | HR (95% CI)                         | p value | HR (95% CI)                                        | p value |
| Marijuana smoking - current                                                                      |                                    |         |                                     |         |                                                    |         |
| Daily or weekly                                                                                  | 1.40 (1.10-1.77)                   | 0.0056  | 1.34 (1.06-1.71)                    | 0.016   | –                                                  |         |
| Monthly or less                                                                                  | 1.00 (Ref.)                        |         | 1.00 (Ref.)                         |         | –                                                  |         |
| Marijuana smoking - prior two-year average (per 10 days use/month increase, continuous variable) | 1.08 (1.03-1.13)                   | 0.012   | -                                   |         | 1.06 (1.00-1.11)                                   | 0.041   |
| Tobacco smoking - prior two-year average                                                         |                                    |         |                                     |         |                                                    |         |
| ≥1/2 packs/day                                                                                   | 1.39 (1.10-1.76)                   | 0.0058  | 1.26 (0.99-1.61)                    | 0.056   | -                                                  |         |
| >0 - <1/2 packs/day                                                                              | 1.10 (0.82-1.46)                   | 0.53    | 1.05 (0.78-1.42)                    | 0.73    | -                                                  |         |
| 0 packs/day <sup>1</sup>                                                                         | 1.00 (Ref.)                        |         | 1.00 (Ref.)                         |         | -                                                  |         |
| Tobacco smoking - prior two-year average (per pack/day increase, continuous variable)            | 1.10 (1.05-1.15)                   | 0.0059  | -                                   |         | 1.04 (0.99-1.10)                                   | 0.069   |
| Baseline calendar year                                                                           |                                    |         |                                     |         |                                                    |         |
| 2001-2014                                                                                        | 0.64 (0.52-0.79)                   | <0.0001 | 0.70 (0.56-0.89)                    | 0.0032  | 0.71 (0.56-0.89)                                   | 0.0035  |
| 1996-2000                                                                                        | 1.00 (Ref.)                        |         | 1.00 (Ref.)                         |         | 1.00 (Ref.)                                        |         |
| CD4 count (cells/μL)                                                                             |                                    |         |                                     |         |                                                    |         |
| <200                                                                                             | 3.71 (2.86-4.81)                   | <0.0001 | 3.37 (2.58-4.41)                    | <0.0001 | 3.38 (2.59-4.41)                                   | <0.0001 |
| 200-349                                                                                          | 1.52 (1.16-2.00)                   | 0.0026  | 1.44 (1.10-1.90)                    | 0.0091  | 1.44 (1.10-1.90)                                   | 0.0089  |
| 350-499                                                                                          | 1.40 (1.08-1.81)                   | 0.011   | 1.36 (1.05-1.76)                    | 0.020   | 1.36 (1.05-1.76)                                   | 0.019   |
| 500+                                                                                             | 1.00 (Ref.)                        |         | 1.00 (Ref.)                         |         | 1.00 (Ref.)                                        |         |
| ART use                                                                                          |                                    |         |                                     |         |                                                    |         |
| Yes <sup>2</sup>                                                                                 | 0.67 (0.47-0.94)                   | 0.022   | 0.83 (0.58-1.18)                    | 0.31    | 0.83 (0.58-1.19)                                   | 0.31    |
| No                                                                                               | 1.00 (Ref.)                        |         | 1.00 (Ref.)                         |         | 1.00 (Ref.)                                        |         |

Hazard ratios (HR) for first incident infectious pulmonary diagnosis (influenza or viral pneumonia, bacterial pneumonia, other pneumonia, acute bronchitis, *Pneumocystis* pneumonia, tuberculosis). All models were adjusted by race and education. All covariates were time-varying except baseline calendar year, race, and education; age was used as the time variable. Continuous variables for prior two-year average marijuana and tobacco smoking were square-root transformed to reduce skewness and reported as back-transformed estimates in their original scale. Models evaluated 421 diagnoses in 1,287 participants with 19,009 person-visits with no restriction on CD4 cell counts.

1 - Reference category includes former tobacco smokers.

2 - Includes person-visits with HIV viral load <400 copies/ml where ART data missing.
